# Supplementary material for: Application of Electronic Health Record Text Mining: Real-World Tolerability, Safety, and Efficacy of Adjuvant Melanoma Treatments
Source: MDPI journal article supplement (doi:10.3390/cancers14215426), 2022-11-03
Supplement: s1 [file s1]

## Supplementary Files

Supplementary File S1: Overview of queries for patient inclusion and data extraction in CTcue. (See separate excel file).

Supplementary File S2: Treatment limiting adverse events per individual patient for nivolumab (2a), pembrolizumab (2b), and dabrafenib plus trametinib (2c).

| Supplementary file 2a                                      |   |   |   |   |   |   |   |   |   |       |
|------------------------------------------------------------|---|---|---|---|---|---|---|---|---|-------|
| Nivolumab<br>N = 9                                         |   |   |   |   |   |   |   |   |   |       |
| Treatment-limiting adverse event<br>per individual patient | 1 | 2 | 3 | 4 | 5 | 6 | 7 | 8 | 9 | Total |
| Colitis                                                    | 1 | 1 |   |   |   |   |   |   |   | 2     |
| Pneumonitis                                                |   | 1 | 1 |   |   |   |   |   |   | 2     |
| Hepatitis                                                  |   |   |   | 1 | 1 |   |   |   |   | 2     |
| Thyroiditis                                                |   |   |   | 1 | 1 |   |   |   |   | 2     |
| Myalgia                                                    |   |   |   | 1 |   |   |   |   |   | 1     |
| Myocarditis                                                |   |   |   | 1 |   |   |   |   |   | 1     |
| Arthralgia                                                 |   |   |   |   |   | 1 |   |   |   | 1     |
| Hypocortisolism                                            |   |   |   |   |   |   | 1 |   |   | 1     |
| Polymyalgia rheumatica                                     |   |   |   |   |   |   |   | 1 |   | 1     |
| Meningitis                                                 |   |   |   |   |   |   |   |   | 1 | 1     |
| Adrenalitis                                                |   |   |   |   |   |   |   |   | 1 | 1     |
| Total                                                      | 1 | 2 | 1 | 4 | 2 | 1 | 1 | 1 | 2 |       |

| Supplementary file 2b                                      |       |
|------------------------------------------------------------|-------|
| Pembrolizumab<br>N = 3                                     |       |
| Treatment-limiting adverse event<br>per individual patient | Total |
| Colitis                                                    | 1     |
| Arthralgia                                                 | 1     |
| Myalgia                                                    | 1     |
| Pneumonitis                                                | 1     |
| Total                                                      | 1 2 1 |

| Supplementary file 2c                                   |   |   |   |   |   |   |   |   |  |       |
|---------------------------------------------------------|---|---|---|---|---|---|---|---|--|-------|
| Dabrafenib plus trametinib<br>N = 8                     |   |   |   |   |   |   |   |   |  |       |
| Treatment-limiting adverse event per individual patient | 1 | 2 | 3 | 4 | 5 | 6 | 7 | 8 |  | Total |
| Pyrexia                                                 | 1 | 1 | 1 | 1 | - | - | 1 | - |  | 5     |
| Chills                                                  | 1 | 1 | 1 | - | - | - | - | - |  | 3     |
| Nausea                                                  | 1 | 1 | 1 | - | - | - | - | - |  | 3     |
| Myalgia                                                 | 1 | - | - | - | - | 1 | - | - |  | 2     |
| Headache                                                | 1 | - | - | - | - | - | - | - |  | 1     |
| Liver function disorders                                | 1 | - | - | - | - | - | - | - |  | 1     |
| Fatigue                                                 | - | 1 | - | - | - | - | - | 1 |  | 2     |
| Syncope                                                 | - | 1 | - | - | - | - | - | - |  | 1     |
| Skin disorder                                           | - | - | - | 1 | 1 | 1 | 1 | - |  | 4     |
| Allergic reaction                                       | - | - | - | - | 1 | - | - | - |  | 1     |
| Tachycardia                                             | - | - | - | - | 1 | - | - | - |  | 1     |
| Decreased appetite                                      | - | - | 1 | - | - | - | - | - |  | 1     |
| Arthralgia                                              | - | - | - | - | - | 1 | - | - |  | 1     |
| Malaise                                                 | - | - | - | 1 | - | - | - | 1 |  | 2     |
| Total                                                   | 6 | 5 | 4 | 3 | 3 | 3 | 2 | 2 |  |       |
